# Supplementary material
Source: PubMed Central journal article supplement (PMC5204157)
Supplement: rspb20162337supp1.pdf [file rspb20162337supp1.pdf]

## Supporting information

**Steffen Kiel:** A biogeographic network reveals evolutionary links between deep sea hydrothermal vent and methane seep faunas

**Table S1.** Locality information.

| Short name     | Locality description                                                                 | Habitat type  | Depth (m) | Reference |
|----------------|--------------------------------------------------------------------------------------|---------------|-----------|-----------|
| AleutianT      | Aleutian Trench, North Pacific                                                       | seep          | 4800-4960 | (1)       |
| Anaximander    | Anaximander mud field, Mediterranean Sea                                             | seep          | 1700-2000 | (2)       |
| AnyasGarden    | Anyas's Garden, Logatchev vent field, Mid-Atlantic Ridge                             | sed. vent     | 3038      | (3)       |
| AntarcticWhale | South Sandwich Arc, southern Ocean                                                   | whale fall    | 1444-1447 | (4)       |
| BarbadosEP     | Barbados-El Pilar, North Atlantic                                                    | seep          | 1300      | (5)       |
| BarbadosOA     | Barbados-Orenoque A, North Atlantic                                                  | seep          | 1700      | (5)       |
| BarbadosOB     | Barbados-Orenoque B, North Atlantic                                                  | seep          | 2000      | (5)       |
| Blake          | Blake Ridge, off North Carolina, North Atlantic                                      | seep          | 2200      | (6)       |
| CadizL         | Gulf of Cadiz, lower slope, including the sites Carlos Ribeiro, Bonjordim, and Porto | seep          | 2200-3900 | (7)       |
| CadizM         | Gulf of Cadiz, mid-slope, including the sites Darwin and Captain Arutyonov           | seep          | 1000-2000 | (7)       |
| CadizU         | Gulf of Cadiz, upper slope, including the sites Mercator, Kidd, and Meknes           | seep          | 350-700   | (7)       |
| CatalinaWhale  | Santa Catalina Basin, East Pacific                                                   | whale fall    | 1240      | (8)       |
| Chile          | Chile, off Concepcion Bay, southeastern Pacific                                      | seep          | 651-934   | (9)       |
| Colombia       | Colombia, Caribbean Sea, stations E51 MACROI and E284 ANH-II                         | seep          | 500-705   | (10)      |
| CostaRicaM     | the sites Mound 11, Mound Quepos, and Jaco Wall                                      | seep          | 1007-1854 | (11)      |
| CostaRicaU     | the sites Jaco Summit and Mound 12                                                   | seep          | 741-997   | (11)      |
| Edison         | Edison Seamount, West Pacific                                                        | sed. vent     | 1450      | (12)      |
| EPRN           | northern East Pacific Rise (9°-21°N)                                                 | vent          | 2500-2750 | (13)      |
| EPRS           | southern East Pacific Rise (7°-23°S)                                                 | vent          | 2600      | (13)      |
| ESR            | East Scotia Ridge, southern Ocean                                                    | vent          | 2600      | (14)      |
| Fiji           | Fiji Basin, West Pacific                                                             | vent          | 1955-2765 | (15)      |
| Florida        | Florida Escarpment, Gulf of Mexico                                                   | seep          | 3243-3314 | (16)      |
| Formosa        | Formosa Ridge, South China Sea, West Pacific                                         | seep          | 1120      | (17)      |
| Galapagos      | Galapagos Rift, eastern Pacific                                                      | vent          | 2500-2700 | (18)      |
| GelaBasin      | Gela Basin pockmarks, Mediterranean Sea                                              | seep          | 800       | (19)      |
| GhostCity      | Ghost City, Pleistocene age serpentinisation vent near Rainbow on the MAR            | serp. vent    | 2100      | (20)      |
| Gorda          | Gorda Ridge, East Pacific                                                            | sed. vent     | 2700-3271 | (21)      |
| Guaymas        | Guaymas Basin, Gulf of California, East Pacific                                      | sed. vent     | 2020-2033 | (22)      |
| GUINESS        | GUINESS, eastern Atlantic                                                            | seep          | 650       | (23)      |
| HydrateRidge   | Hydrate Ridge, off Oregon, East Pacific                                              | seep          | 770       | (24)      |
| IcelandWhale   | fauna associated with whale bones trawled around Iceland                             | whale fall    | 200-400   | (25)      |
| JacoScar       | Jaco Scar hydrothermal seep, East Pacific                                            | hydroth. seep | 1752-1805 | (26)      |
| JaliscoBlock   | Jalisco Block, East Pacific                                                          | seep          | 3800      | (27)      |
| JapanT         | Japan Trench, northwestern Pacific                                                   | seep          | 5350-6400 | (28)      |
| JdFax          | Juan de Fuca Ridge, Axial Seamount                                                   | vent          | 1500-1600 | (13)      |

|                 |                                                                                      |            |           |      |
|-----------------|--------------------------------------------------------------------------------------|------------|-----------|------|
| JdFEndeavour    | Juan de Fuca Ridge, Endeavour Segment                                                | vent       | 2200-2400 | (13) |
| JdFExplorer     | Juan de Fuca Ridge, Explorer Ridge                                                   | vent       | 1762      | (13) |
| JdFMV           | Juan de Fuca Ridge, Middle Valley                                                    | vent       | 2423      | (13) |
| Kaikata         | Kaikata Seamount, West Pacific                                                       | vent       | 470       | (29) |
| Kairei          | Kairei Field, Central Indian Ridge                                                   | vent       | 2420-2450 | (30) |
| KurileT         | Kurile Trench, northwest Pacific                                                     | seep       | 4700-6200 | (31) |
| KuroshimaKnoll  | Kuroshima Knoll, West Pacific                                                        | sed. vent  | 637-812   | (29) |
| Lau             | Lau Basin, West Pacific                                                              | vent       | 1750-1900 | (15) |
| Logatchev       | Logatchev, excluding the Anya's Garden site, Mid-Atlantic Ridge                      | vent       | 3040      | (32) |
| LouisianaL      | Louisiana Slope (Gulf of Mexico) lower slope                                         | seep       | 2000-3000 | (33) |
| LouisianaM      | Louisiana Slope (Gulf of Mexico) mid-slope                                           | seep       | 1000-2000 | (33) |
| LouisianaU      | Louisiana Slope (Gulf of Mexico) upper slope                                         | seep       | <1000     | (33) |
| LuckyStrike     | Lucky Strike, Mid-Atlantic Ridge                                                     | vent       | 1620-1720 | (34) |
| ManusDC         | Manus Basin, Desmos Cauldron, West Pacific                                           | sed. vent  | 2000      | (35) |
| ManusPac        | Manus Basin, Pacmanus, West Pacific                                                  | sed. vent  | 1700      | (36) |
| ManusVW         | Manus Basin, Vienna Woods, West Pacific                                              | sed. vent  | 2500      | (37) |
| MarianaAS       | Mariana Trough, Alice Springs, West Pacific                                          | vent       | 3650      | (38) |
| MarianaForecast | Mariana Trough, Forecast, West Pacific                                               | vent       | 1450      | (38) |
| MarmaraSea      | Marmara Sea, Mediterranean Sea                                                       | seep       | 1120      | (39) |
| MenezGwen       | Menez Gwen, Mid-Atlantic Ridge                                                       | vent       | 850       | (34) |
| MohnRidge       | Mohn Ridge, northern Mid-Atlantic Ridge                                              | sed. vent  | 500-750   | (40) |
| Monterey        | Monterey Canyon, upper slope including sites Mt Crushmore, Clam field, and Clam flat | seep       | 635-1000  | (41) |
| MontereyWhale   | whale-fall in Monterey Canyon in 2893 m                                              | whale fall | 2893      | (42) |
| NankaiL         | Nankai Trough, lower slope                                                           | seep       | 2500-3800 | (29) |
| NankaiM         | Nankai Trough, middle slope                                                          | seep       | 1600-2400 | (29) |
| NankaiU         | Nankai Trough, upper slope                                                           | seep       | <1500     | (29) |
| NicolasWhale    | San Nicolas slope, East Pacific                                                      | whale fall | 960       | (8)  |
| NZ              | Hikurangi Margin, New Zealand                                                        | seep       | 1100-1200 | (43) |
| NZwhale         | fauna associated with whale bones trawled around New Zealand                         | whale fall | 13-1242   | (44) |
| Okhotsk         | Sea of Okhotsk, upper slope                                                          | seep       | 370-380   | (45) |
| Okinawall       | Okinawa Basin, Iheya and Izena sites, West Pacific                                   | sed. vent  | 1340-1350 | (29) |
| OkinawaMEK      | Okinawa Basin, Minami-Ensei Knoll, West Pacific                                      | sed. vent  | 700       | (29) |
| Olimpi          | Olimpi area mud field, Mediterranean Sea                                             | seep       | 2000      | (2)  |
| Paita           | Peru, off Paita, East Pacific                                                        | seep       | 2600-3400 | (46) |
| PNG             | Broken Water Bay, off Papua New Guinea, West Pacific                                 | seep       | 400       | (47) |
| Rainbow         | Rainbow, Mid-Atlantic Ridge                                                          | vent       | 2260      | (48) |
| REGAB           | REGAB, West Atlantic                                                                 | seep       | 3150      | (33) |
| SagamiBay       | Sagami Bay, West Pacific                                                             | seep       | 750-1500  | (29) |
| SebutalCow      | off Portugal, Sebutal canyon cow experiment, northeast Atlantic                      | whale fall | 1000      | (49) |
| SnakePit        | Snake Pit, Mid-Atlantic Ridge                                                        | vent       | 3478-3515 | (50) |
| Solitaire       | Solitaire vent field, Central Indian Ridge                                           | vent       | 2606      | (51) |
| Sonora          | Sonora Margin transform faults, East Pacific                                         | seep       | 1550      | (52) |
| VonDamm         | Von Damm vent field, Mid-Cayman Ridge, Caribbean Sea                                 | vent       | 2300      | (53) |

## References

1. Lutz RA, *et al.* (1996) Biological communities and geological features associated with methane/sulfide seepage at 4960m in the Aleutian subduction zone. *Eos* 77:F405.
2. Olu K, *et al.* (2004) Cold seep communities in the deep eastern Mediterranean Sea: composition, symbiosis and spatial distribution on mud volcanoes. *Deep-Sea Res. I* 51:1915-1936.
3. Gebruk AV, Chevallon P, Shank TM, Lutz RA, & Vrijenhoek RC (2000) Deep-sea hydrothermal vent communities of the Logatchev area (14°45' N, Mid-Atlantic Ridge): Diverse biotopes and high biomass. *J. Mar. Biol. Ass. U.K.* 80:383-393.
4. Amon DJ, *et al.* (2013) The discovery of a natural whale fall in the Antarctic deep sea. *Deep-Sea Res. II* 92:87-96.
5. Olu K, Sibuet M, Harmegnies F, Foucher J-P, & Fiala-Médoni A (1996) Spatial distribution of diverse cold seep communities living on various diapiric structures of the southern Barbados prism. *Prog. Oceanogr.* 38:347-376.
6. Van Dover CL, *et al.* (2003) Blake Ridge methane seeps: characterization of a soft-sediment, chemosynthetically based ecosystem. *Deep-Sea Res. I* 50:281-300.
7. Cunha MR, *et al.* (2013) Macrofaunal assemblages from mud volcanoes in the Gulf of Cadiz: abundance, biodiversity and diversity partitioning across spatial scales. *Biogeosciences* 10:2553-2568.
8. Smith CR & Baco AR (2003) Ecology of whale falls at the deep-sea floor. *Oceanogr. Mar. Biol. Ann. Rev.* 41:311-354.
9. Sellanes J, Quiroga E, & Neira C (2008) Megafauna community structure and trophic relationships at the recently discovered Concepción methane seep area, Chile, ~36°S. *ICES Journal of Marine Science* 65:1102-1111.
10. Gracia A, Rangel-Buitrago N, & Sellanes J (2012) Methane seep molluscs from the Sinú-San Jacinto fold belt in the Caribbean Sea of Colombia. *J. Mar. Biol. Ass. U.K.* 92(6):1367-1377.
11. Levin LA, *et al.* (2015) Biodiversity on the rocks: macrofauna inhabiting authigenic carbonate at Costa Rica methane seeps. *PLoS ONE* 10(7):e0131080.
12. Herzig P, *et al.* (1994) Submarine volcanism and hydrothermal venting studied in Papua, New Guinea. *Eos* 75(44):513-516.
13. Tunnicliffe V (1988) Biogeography and evolution of hydrothermal-vent fauna in the eastern Pacific Ocean. *Proc. R. Soc. B* B233:347-366.
14. Rogers AD, *et al.* (2012) The discovery of new deep-sea hydrothermal vent communities in the Southern Ocean and implications for biogeography. *PLoS Biology* 10(1):e1001234.
15. Desbruyères D, Alayse-Danet A-M, Ohta S, & Cruises tSPoBaS (1994) Deep-sea hydrothermal communities in southwestern Pacific back-arc basins (the North Fiji and Lau Basins): Composition, microdistribution and food web. *Mar. Geol.* 116(1-2):227-242.
16. Paull CK, *et al.* (1984) Biological communities at the Florida Escarpment resemble hydrothermal vent taxa. *Science* 226:965-967.
17. Feng D & Chen D (2015) Authigenic carbonates from an active cold seep of the northern South China Sea: New insights into fluid sources and past seepage activity. *Deep-Sea Res. II* in press.
18. Corliss JB, *et al.* (1979) Submarine thermal springs on the Galápagos Rift. *Science* 203:1073-1083.
19. Taviani M, *et al.* (2013) The Gela Basin pockmark field in the strait of Sicily (Mediterranean Sea): chemosymbiotic faunal and carbonate signatures of postglacial to modern cold seepage. *Biogeosciences* 10:4653-4671.
20. Lartaud F, *et al.* (2011) Fossil evidence for serpentinization fluids fueling chemosynthetic assemblages. *Proc. Natl. Acad. Sci. U.S.A.* 108:7698-7703.
21. Van Dover CL, Grassle JF, & Boudrias M (1990) Hydrothermal vent fauna of Escanaba Trough (Gorda Ridge). *Gorda Ridge*, ed McMurray GR (Springer, New York), pp 285-287.

22. Lonsdale P & Becker K (1985) Hydrothermal plumes, hot springs, and conductive heat flow in the Southern Trough of Guaymas Basin. *Earth. Planet. Sci. Lett.* 73:211-225.
23. Duperron S, *et al.* (2012) Diversity of symbioses between chemosynthetic bacteria and metazoans at the Guinness cold seep site (Gulf of Guinea, West Africa). *MicrobiologyOpen* 1(4):467-480.
24. Sahling H, Rickert D, Lee RW, Linke P, & Suess E (2002) Macrofaunal community structure and sulfide flux at gas hydrate deposits from the Cascadia convergent margin, NE Pacific. *Mar. Ecol. Prog. Ser.* 231:121-138.
25. Warén A (1989) New and little known mollusca from Iceland. *Sarsia* 74:1-28.
26. Levin LA, *et al.* (2012) A hydrothermal seep on the Costa Rica margin: middle ground in a continuum of reducing ecosystems. *Proc. R. Soc. B* 279:20120205.
27. Warén A & Bouchet P (2001) Gastropoda and Monoplacophora from hydrothermal vents and seeps; new taxa and records. *Veliger* 44(2):116-231.
28. Sasaki T, Warén A, Kano Y, Okutani T, & Fujikura K (2010) Gastropods from Recent hot vents and cold seeps: systematics, diversity and life strategies. *The Vent and Seep Biota*, Topics in Geobiology, ed Kiel S (Springer, Heidelberg), Vol 33, pp 169-254.
29. Watanabe H, Fujikura K, Kojima S, Miyazaki J-I, & Fujiwara Y (2010) Japan: Vents and seeps in close proximity. *The Vent and Seep Biota*, Topics in Geobiology, ed Kiel S (Springer, Heidelberg), Vol 33, pp 379-402.
30. Van Dover CL, *et al.* (2001) Biogeography and ecological setting of Indian Ocean hydrothermal vents. *Science* 294:818-823.
31. Métivier B, Okutani T, & Ohta S (1986) *Calypptogena (Ectenagena) phaseoliformis* n. sp., an unusual vesicomid bivalve collected by the submersible *Nautile* from abyssal depths of the Japan and Kurile Trenches. *Venus* 45(3):161-168.
32. Gebruk AV, Chevallon P, Shank TM, Lutz RA, & Vrijenhoek RC (2000) Deep-sea hydrothermal vent communities of the Logatchev area (14°45'N, Mid-Atlantic Ridge): diverse biotopes and high biomass. *Journal of the Biological Association of the U.K.* 80:383-393.
33. Olu K, *et al.* (2010) Biogeography and potential exchanges among the Atlantic equatorial belt cold-seep faunas. *PLoS ONE* 5(8):e11967.
34. Fouquet Y, *et al.* (1994) A detailed study of the Lucky Strike Hydrothermal site and discovery of a new hydrothermal site: Menez Gwen; preliminary results of the Diva 1 Cruise (5-29 May, 1994). *InterRidge News* 3(2):14-17.
35. Ohta S, Hashimoto J, & Cruise PoB-M (1997) Hydrothermal vent fields and vent-associated biological communities in the DESMOS Cauldron, eastern Manus Basin. *JAMSTEC Journal of Deep Sea Research* 13:233-242 (in Japanese with English abstract).
36. Binns R, Barriga FJAS, & Miller DJ (2007) Leg 193 synthesis: anatomy of an active felsic-hosted hydrothermal system, Eastern Manus Basin, Papua New Guinea. *Proceedings of the Ocean Drilling Program, Scientific Results* 193 1-71.
37. Tufar W (1990) Modern hydrothermal activity, formation of complex massive sulfide deposits and associated vent communities in the Manus back-arc basin (Bismarck Sea, Papua New Guinea). *Mitt. österr. geol. Ges.* 82:183-210.
38. Hessler RR & Lonsdale P (1991) Biogeography of Mariana Trough hydrothermal vent communities. *Deep Sea Research Part A. Oceanographic Research Papers* 38(2):185-199.
39. Ritt B, *et al.* (2010) First insights into the structure and environmental setting of cold-seep communities in the Marmara Sea. *Deep-Sea Res. I* 57(9):1120-1136.
40. Schander C, *et al.* (2010) The fauna of hydrothermal vents on the Mohn Ridge (North Atlantic). *Marine Biology Research* 6(2):155-171.
41. Barry JP, *et al.* (1996) Biologic and geologic characteristics of cold seeps in Monterey Bay, California. *Deep-Sea Res. I* 43(11-12):1739-1762.
42. Braby CE, Rouse GW, Johnson SB, Jones WJ, & Vrijenhoek RC (2007) Bathymetric and temporal variation among *Osedax* boneworms and associated megafauna on whale-falls in Monterey Bay, California. *Deep-Sea Res. I* 54:1773-1791.

43. Baco AR, Rowden AA, Levin LA, Smith CR, & Bowden DA (2010) Initial characterization of cold seep faunal communities on the New Zealand Hikurangi margin. *Mar. Geol.* 272(1-4):251-259.
44. Marshall BA (1988) Skeneidae, Vitrinellidae and Orbitestellidae (Mollusca: Gastropoda) associated with biogenic substrata from bathyal depths off New Zealand and New South Wales. *Journal of Natural History* 22:949-1004.
45. Sahling H, *et al.* (2003) Depth-related structure and ecological significance of cold-seep communities - a case study from the Sea of Okhotsk. *Deep-Sea Res. I* 50:1391-1409.
46. Olu K, Duperret A, Sibuet M, Foucher J-P, & Fiala-Médoni A (1996) Structure and distribution of cold seep communities along the Peruvian active margin: Relationship to geological and fluid patterns. *Mar. Ecol. Prog. Ser.* 132:109-125.
47. Samadi S, *et al.* (2015) Patchiness of deep-sea communities in Papua New Guinea and potential susceptibility to anthropogenic disturbances illustrated by seep organisms. *Mar. Ecol.* 36 (Suppl. 1):109-132.
48. Fouquet Y, *et al.* (1997) Discovery and first submersible investigations on the Rainbow hydrothermal field on the MAR (36°14'N). *Eos* 78:832.
49. Hilario A, *et al.* (2015) First clues on the ecology of whale falls in the deep Atlantic Ocean: results from an experiment using cow carcasses. *Mar. Biol.* 36:82-90.
50. Segonzac M (1992) The hydrothermal vent communities of Snake Pit area (Mid-Atlantic Ridge; 23°N, 3,480 m): megafaunal composition and microdistribution. *Comptes rendus de l'Académie des sciences. Série 3, Sciences de la vie* 314(13):593-600.
51. Nakamura K, *et al.* (2012) Discovery of new hydrothermal activity and chemosynthetic fauna on the Central Indian Ridge at 18°-20°S. *PLoS ONE* 7(3):e32965.
52. Portail M, *et al.* (2015) Comparative study of vent and seep macrofaunal communities in the Guaymas Basin. *Biogeosciences Discussion* 12:8497-8571.
53. Plouviez S, Jacobson A, Wu M, & Van Dover CL (2015) Characterization of vent fauna at the Mid-Cayman Spreading Center. *Deep-Sea Res. I* 97:124-133.





















|                 |    |  |  |  |   |   |   |   |   |    |    |   |    |    |    |   |   |   |    |  |  |  |  |  |  |   |    |    |    |
|-----------------|----|--|--|--|---|---|---|---|---|----|----|---|----|----|----|---|---|---|----|--|--|--|--|--|--|---|----|----|----|
| Sutilizona      |    |  |  |  | 4 |   |   |   |   |    |    |   |    |    |    |   |   |   |    |  |  |  |  |  |  |   | 4  |    |    |
| Symmetriapelta  |    |  |  |  |   |   |   |   |   |    |    |   |    |    |    |   |   |   |    |  |  |  |  |  |  |   |    |    |    |
| Symmetromphalus | 4  |  |  |  |   |   | 4 | 4 | 4 | 4  |    |   |    |    |    |   |   |   |    |  |  |  |  |  |  |   |    |    |    |
| Syrnola         |    |  |  |  |   |   |   |   |   |    |    |   |    |    |    |   |   |   |    |  |  |  |  |  |  |   |    |    |    |
| Tamu            |    |  |  |  | 5 |   |   |   |   |    |    |   |    |    |    |   |   |   |    |  |  |  |  |  |  |   |    |    |    |
| Taranis         |    |  |  |  |   |   |   |   |   |    |    |   |    |    |    |   |   |   |    |  |  |  |  |  |  |   |    | 13 |    |
| Temnocinclis    |    |  |  |  |   |   |   |   |   |    |    |   |    |    |    |   |   |   |    |  |  |  |  |  |  |   |    |    |    |
| Tentaoculus     |    |  |  |  |   |   |   |   |   |    |    |   |    |    |    | 4 |   |   |    |  |  |  |  |  |  |   |    |    |    |
| Thyasira        |    |  |  |  | 5 |   |   |   |   |    |    |   |    | 68 |    |   |   |   |    |  |  |  |  |  |  | 5 |    |    | 75 |
| Toledonia       |    |  |  |  |   |   |   |   |   |    |    |   | 68 |    |    |   |   |   |    |  |  |  |  |  |  |   |    |    |    |
| Tractolira      |    |  |  |  |   |   |   |   |   |    |    |   |    |    |    |   | 4 |   |    |  |  |  |  |  |  |   |    |    |    |
| Trophon         |    |  |  |  |   |   |   |   |   |    |    |   |    |    |    |   |   |   |    |  |  |  |  |  |  |   |    |    |    |
| Waisiuconcha    |    |  |  |  |   |   |   |   |   |    |    |   |    |    |    |   |   |   |    |  |  |  |  |  |  |   |    |    |    |
| Wareniconcha    |    |  |  |  |   |   |   |   |   |    |    |   |    |    |    |   |   |   |    |  |  |  |  |  |  |   | 82 |    |    |
| Ventsia         | 4  |  |  |  |   |   |   |   |   |    | 4  | 4 |    |    |    |   |   |   |    |  |  |  |  |  |  |   |    |    |    |
| Vesicomya       |    |  |  |  |   |   |   |   |   |    |    |   |    |    |    |   | 3 |   |    |  |  |  |  |  |  |   |    |    |    |
| Vetulonia       | 54 |  |  |  |   |   |   |   |   |    |    |   |    |    |    |   |   |   |    |  |  |  |  |  |  |   |    |    |    |
| Viridibuccinum  |    |  |  |  |   |   |   |   |   |    |    |   |    |    |    |   |   |   |    |  |  |  |  |  |  |   |    |    |    |
| Volutomitra     |    |  |  |  |   |   |   |   |   |    |    |   |    |    |    |   |   |   |    |  |  |  |  |  |  |   |    |    |    |
| Volvarina       |    |  |  |  |   |   |   |   |   |    |    |   |    |    |    |   |   |   |    |  |  |  |  |  |  |   |    |    |    |
| Xenophora       |    |  |  |  |   |   |   |   |   |    |    |   |    |    |    |   |   |   |    |  |  |  |  |  |  |   |    |    |    |
| Xylodiscula     |    |  |  |  |   | 4 |   |   |   |    | 80 | 4 |    |    |    |   |   | 4 | 72 |  |  |  |  |  |  |   |    | 78 |    |
| Xyloskenea      |    |  |  |  |   |   |   |   |   |    |    |   |    |    |    |   |   |   |    |  |  |  |  |  |  |   |    |    |    |
| Yoldia          |    |  |  |  |   |   |   |   |   |    |    |   |    |    | 67 |   |   |   |    |  |  |  |  |  |  |   |    |    |    |
| Yoldiella       |    |  |  |  |   |   |   |   |   | 80 | 68 |   |    |    |    |   |   |   |    |  |  |  |  |  |  |   |    |    |    |
| Zetela          |    |  |  |  |   |   |   |   |   |    |    |   |    |    |    |   |   |   |    |  |  |  |  |  |  |   |    |    |    |

## References

- 1 Gracia, A., Rangel-Buitrago, N. & Sellanes, J. J. *Mar. Biol. Ass. U.K.* **92**, 1367-1377 (2012).
- 2 Krylova, E. M., Sahling, H. & Janssen, R. J. *Moll. Stud.* **76**, 107-132 (2010).
- 3 Sasaki, T., Okutani, T. & Fujikura, K. *Venus* **64**, 87-133 (2005).
- 4 Warén, A. & Bouchet, P. *Veliger* **44**, 116-231 (2001).
- 5 Olu, K. *et al. PLoS ONE* **5**, e11967 (2010).
- 6 Sellanes, J., Quiroga, E. & Neira, C. *ICES Journal of Marine Science* **65**, 1102-1111 (2008).
- 7 Levin, L. A. *et al. PLoS ONE* **10**, e0131080 (2015).
- 8 Oliver, P. G., Rodrigues, C. F. & Cunha, M. R. *Zookeys* **113**, 1-38 (2011).
- 9 Portail, M. *et al. Biogeosciences Discussion* **12**, 8497-8571 (2015).
- 10 Duperron, S. *et al. MicrobiologyOpen* **1**, 467-480 (2012).
- 11 Sahling, H. *et al. Mar. Ecol. Prog. Ser.* **231**, 121-138 (2002).
- 12 Samadi, S. *et al. Mar. Ecol.* **36** (Suppl. 1), 109-132 (2015).
- 13 Olu, K. *et al. Deep-Sea Res. I* **51**, 1915-1936 (2004).
- 14 Génio, L. *et al. Biogeosciences* **10**, 5159-5170 (2013).
- 15 Decker, C. & Olu, K. *Mar. Ecol.* **33**, 231-245 (2012).
- 16 Okutani, T., Hashimoto, J. & Sasaki, T. *Venus* **63**, 1-11 (2004).
- 17 Lartaud, F. *et al. Proc. Natl. Acad. Sci. U.S.A.* **108**, 7698-7703 (2011).
- 18 Levin, L. A. *et al. Proc. R. Soc. B* **279**, 20120205 (2012).
- 19 Valdés, F., Sellanes, J. & D'Elía, G. *Zool. Stud.* **51**, 1154-1164 (2013).
- 20 Krylova, E. M. & Janssen, R. *Archiv Moll.* **135**, 231-261 (2006).
- 21 Desbruyères, D., Segonzac, M. & Bright, M. *Denisia* **18**, 1-544 (2006).
- 22 Peek, A. S. *et al. Mar. Biol.* **130**, 151-161 (1997).
- 23 Okutani, T. *et al. Venus* **68**, 15-25 (2009).
- 24 Watanabe, H. *et al. in The Vent and Seep Biota* (ed Kiel, S) 379-402 (Springer, 2010).
- 25 Barry, J. P. & Kochevar, R. E. *Veliger* **42**, 117-123 (1999).
- 26 Rodrigues, C. F., Hilário, A. & Cunha, M. R. *Biogeosciences* **10**, 2569-2581 (2013).
- 27 Rodrigues, C. F., Oliver, P. G. & Cunha, M. R. *Zootaxa* **1752**, 41-56 (2008).
- 28 Feng, D. *et al. Deep-Sea Res. I* **104**, 52-59 (2015).
- 29 Cosel, R. v., Métivier, B. & Hashimoto, J. *Veliger* **37**, 374-392 (1994).
- 30 Bachraty, C., Legendre, P. & Desbruyères, D. *Deep-Sea Res. I* **56**, 1371-1378 (2009).
- 31 Gustafson, R. G. *et al. Malacologia* **40**, 63-112 (1998).
- 32 Kenk, V. C. & Wilson, B. R. *Malacologia* **26**, 253-271 (1985).
- 33 Olu, K. *et al. Prog. Oceanogr.* **38**, 347-376 (1996).
- 34 Oliver, P. G. *Zoosystematics and Evolution* **91**, 151-165 (2015).
- 35 Sellanes, J. & Krylova, E. M. *J. Mar. Biol. Ass. U.K.* **85**, 969-976 (2005).
- 36 Krylova, E. M. & Sahling, H. *J. Moll. Stud.* **72**, 359-395 (2006).
- 37 Cosel, R. v. & Janssen, R. *Archiv Moll.* **137**, 195-224 (2008).
- 38 Génio, L. *et al. J. Shell. Res.* **27**, 53-61 (2008).
- 39 McLean, J. H. *Zoologica Scripta* **18**, 49-66 (1989).
- 40 Warén, A. *Sarsia* **76**, 53-124 (1991).
- 41 Warén, A. & Bouchet, P. *Deep-Sea Res. I* **56**, 2326-2349 (2009).
- 42 Gebruk, A. V. *et al. Sarsia* **88**, 403 (2003).
- 43 Van Dover, C. L. *et al. Science* **294**, 818-823 (2001).
- 44 Hashimoto, J. & Yamane, T. *Venus* **64**, 1-10 (2005).
- 45 Chen, C. *et al. Zool. J. Linn. Soc.* **175**, 319-335 (2015).
- 46 Warén, A. *Sarsia* **78**, 159-201 (1993).
- 47 Taviani, M. *et al. Biogeosciences* **10**, 4653-4671 (2013).
- 48 Rodrigues, C. F. *et al. Symbiosis* **56**, 129-137 (2012).

49 Gebruk, A. V. *et al. J. Mar. Biol. Ass. U.K.* **80**, 383-393 (2000).  
50 Rogers, A. D. *et al. PLoS Biology* **10**, e1001234 (2012).  
51 Van Dover, C. L. *et al. Deep-Sea Res. I* **50**, 281-300 (2003).  
52 Holmes, A. M., Oliver, P. G. & Sellanes, J. *Journal of Conchology* **38**, 673-681 (2005).  
53 Boss, K. J. & Turner, R. D. *Malacologia* **20**, 161-194 (1980).  
54 Warén, A. & Bouchet, P. *Zoologica Scripta* **22**, 1-90 (1993).  
55 Allen, J. A. *Malacologia* **35**, 141-151 (1993).  
56 Warén, A. *Sarsia* **74**, 1-28 (1989).  
57 Vilvens, C. & Sellanes, J. *Nautilus* **120**, 15-20 (2006).  
58 Martin, A. M. & Goffredi, S. K. *J. Mar. Biol. Ass. U.K.* **92**, 1127-1137 (2011).  
59 Warén, A. *et al. Science* **302**, 1007 (2003).  
60 Oliver, P. G. & Holmes, A. M. *Journal of Conchology* **39**, 175-183 (2006).  
61 Oliver, P. G. & Sellanes, J. *Zootaxa* **1092**, 1-20 (2005).  
62 Harasewych, M. G. & Kantor, Y. I. *J. Moll. Stud.* **68**, 39-44 (2002).  
63 Braby, C. E. *et al. Deep-Sea Res. I* **54**, 1773-1791 (2007).  
64 Baco, A. R. *et al. Mar. Geol.* **272**, 251-259 (2010).  
65 Sahling, H. *et al. Deep-Sea Res. I* **50**, 1391-1409 (2003).  
66 Nakamura, K. *et al. PLoS ONE* **7**, e32965 (2012).  
67 Barry, J. P. *et al. Deep-Sea Res. I* **43**, 1739-1762 (1996).  
68 Schander, C. *et al. Marine Biology Research* **6**, 155-171 (2010).  
69 Smith, C. R. & Baco, A. R. *Oceanogr. Mar. Biol. Ann. Rev.* **41**, 311-354 (2003).  
70 Okutani, T., Tsuchida, S. & Fujikura, K. *Venus* **51**, 137-148 (1992).  
71 Cosel, R. v., Comtet, T. & Krylova, E. M. *Veliger* **42**, 218-248 (1999).  
72 Marshall, B. A. *Nautilus* **108**, 1-8 (1994).  
73 Bowden, D. A. *et al. PLoS ONE* **8**, e76869 (2013).  
74 Cosel, R. v. & Marshall, B. A. *Nautilus* **117**, 31-46 (2003).  
75 Plouviez, S. *et al. Deep-Sea Res. I* **97**, 124-133 (2015).  
76 Krylova, E. M. & Cosel, R. v. *Zoosystema* **33**, 83-99 (2011).  
77 Marshall, B. A. *Records of the National Museum of New Zealand* **12**, 139-143 (1983).  
78 Hilario, A. *et al. Mar. Biol.* **36**, 82-90 (2015).  
79 Campbell, K. A. *et al. Sediment. Geol.* **204**, 83-105 (2008).  
80 Ritt, B. *et al. Deep-Sea Res. I* **57**, 1120-1136 (2010).  
81 Nye, V. *et al. J. Mar. Biol. Ass. U.K.* **93**, 1017-1024 (2013).  
82 Cosel, R. v. & Olu, K. *Deep-Sea Res. II* **56**, 2350-2379 (2009).  
83 Taylor, J. D. & Glover, E. A. *Steenstrupia* **30**, 111-124 (2009).  
84 Cosel, R. v. & Olu, K. *Zoosystema* **30**, 929-944 (2008).  
85 Amon, D. J. *et al. Deep-Sea Res. II* **92**, 87-96 (2013).  
86 Lewis, K. B. & Marshall, B. A. *New Zeal. J. Geol. Geophys.* **39**, 181-200 (1996).  
87 Johnson, S. B. *et al. Biol. Bull.* **219**, 166-177 (2010).  
88 Marshall, B. A. *J. Moll. Stud.* **53**, 121-127 (1987).  
89 Schein, E. *Zootaxa* **1135**, 1-27 (2006).



**Table S3.** Total and observed numbers of links within and across depth ranges. Spearman's  $\rho=0.13$  for total numbers versus numbers in network thresholded at 0.7; Spearman's  $\rho=0.06$  for total numbers versus numbers in minimum spanning tree.

| <b>Numbers of sites per depth range: upper range (U)=33, middle range (M)=33, lower range (L)=13</b> |                                  |                                            |                                                 |                                  |                                            |                                                 |
|------------------------------------------------------------------------------------------------------|----------------------------------|--------------------------------------------|-------------------------------------------------|----------------------------------|--------------------------------------------|-------------------------------------------------|
| <b>Link</b>                                                                                          | <b>N of total possible links</b> | <b>N of links in minimum spanning tree</b> | <b>N of links in network thresholded at 0.7</b> | <b>% of total possible links</b> | <b>% of links in minimum spanning tree</b> | <b>% of links in network thresholded at 0.7</b> |
| <b>U-U</b>                                                                                           | 1089                             | 15                                         | 14                                              | 25.4                             | 19.2                                       | 15.4                                            |
| <b>U-M</b>                                                                                           | 1089                             | 24                                         | 20                                              | 25.4                             | 30.8                                       | 22.0                                            |
| <b>U-L</b>                                                                                           | 429                              | 2                                          | 3                                               | 10.0                             | 2.6                                        | 3.3                                             |
| <b>M-M</b>                                                                                           | 1089                             | 20                                         | 32                                              | 25.4                             | 25.6                                       | 35.2                                            |
| <b>M-L</b>                                                                                           | 429                              | 11                                         | 16                                              | 10.0                             | 14.1                                       | 17.6                                            |
| <b>L-L</b>                                                                                           | 169                              | 6                                          | 6                                               | 3.9                              | 7.7                                        | 6.6                                             |

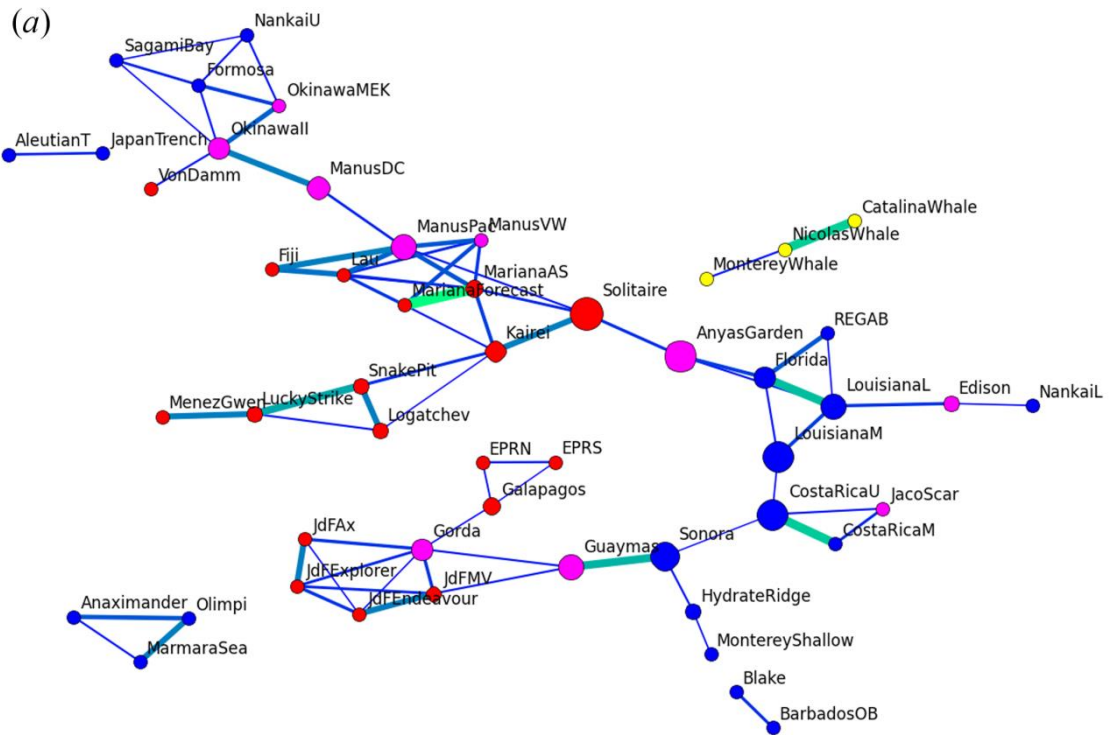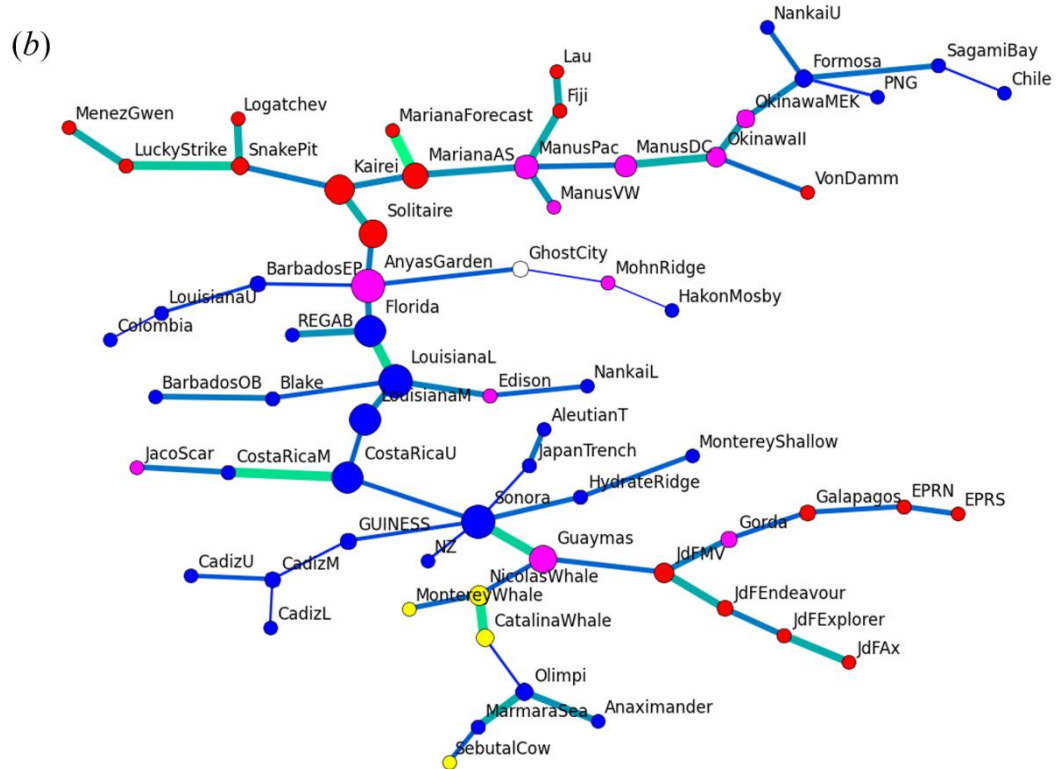

**Figure S1.** Network including only sites with at least five taxa, with the nodes coloured by habitat type (see main paper for colour coding and table S2 for details on sites). *A*, at a threshold of 0.7. *B*, minimum spanning tree.
